# Supplementary material
Source: HighWire-hosted journal article supplement (https://erj.ersjournals.com/content/57/1/2004101)
Supplement: inline-supplementary-material-1 [file inline-supplementary-material-1.pdf]

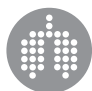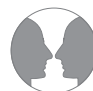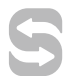

SHAREABLE PDF

# Similar distribution of peripheral blood eosinophil counts in European and East Asian populations from investigations of large-scale general population studies: the Nagahama Study

Hironobu Sunadome<sup>1</sup>, Susumu Sato <sup>2</sup>, Hisako Matsumoto<sup>2</sup>, Kimihiko Murase<sup>1</sup>, Takahisa Kawaguchi<sup>3</sup>, Yasuharu Tabara<sup>3</sup>, Kazuo Chin<sup>1</sup>, Fumihiko Matsuda<sup>3</sup> and Toyohiro Hirai<sup>2</sup>

**Affiliations:** <sup>1</sup>Dept of Respiratory Care and Sleep Control Medicine, Kyoto University Graduate School of Medicine, Kyoto, Japan. <sup>2</sup>Dept of Respiratory Medicine, Kyoto University Graduate School of Medicine, Kyoto, Japan. <sup>3</sup>Center for Genomic Medicine, Kyoto University Graduate School of Medicine, Kyoto, Japan.

**Correspondence:** Susumu Sato, Dept of Respiratory Medicine, Kyoto University Graduate School of Medicine, 54 Kawahara-cho, Shogoin, Sakyo-ku, Kyoto 606-8507, Japan. E-mail: ssato@kuhp.kyoto-u.ac.jp

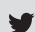

@ERSpublications

**There is ambiguity in the interpretation of peripheral blood total eosinophil count, and several proposed cut-off values or thresholds of 300 cells per  $\mu$ L have been used to identify the patients who are most likely to benefit from inhaled corticosteroids** <https://bit.ly/3ktCxof>

**Cite this article as:** Sunadome H, Sato S, Matsumoto H, *et al.* Similar distribution of peripheral blood eosinophil counts in European and East Asian populations from investigations of large-scale general population studies: the Nagahama Study. *Eur Respir J* 2021; 57: 2004101 [<https://doi.org/10.1183/13993003.04101-2020>].

This single-page version can be shared freely online.

*To the Editor:*

We read with interest the study by HARTL *et al.* [1] entitled “Blood eosinophil count in the general population: typical values and potential confounders”, recently published in the *European Respirator Journal*. This is an excellent paper showing the distribution of blood eosinophil counts in the general population, including more than 10 000 participants. The authors found a right-skewed, non-normal distribution with the tail towards the higher counts.
